# Supplementary material
Source: Elsevier journal article supplement (https://authors.library.caltech.edu/84637/2/mmc1.pdf)
Supplement: mmc1 [file mmc1.pdf]

**Cell, Volume 172**

**Supplemental Information**

**Dynamic Ligand Discrimination  
in the Notch Signaling Pathway**

**Nagarajan Nandagopal, Leah A. Santat, Lauren LeBon, David Sprinzak, Marianne E. Bronner, and Michael B. Elowitz**

### Supplementary Tables

*Supplementary Table 1. Genes up-regulated > 5-fold at 1h or 6h after DAPT washout, compared to untreated control, related to Figure 3.*

Highlighted genes are putative direct NICD targets (Castel et al., 2013).

| Gene            | Untreated (FKPM) | After DAPT washout (FKPM) | Time after DAPT washout |
|-----------------|------------------|---------------------------|-------------------------|
| '8430408G22Rik' | 0.351884         | 5.69606                   | 1h                      |
| 'Atf3'          | 0.374606         | 14.59                     | 1h                      |
| 'Btg2'          | 4.17528          | 84.4997                   | 1h                      |
| 'Csrnp1'        | 4.6935           | 24.1845                   | 1h                      |
| 'Ctgf'          | 212.877          | 1188.84                   | 1h                      |
| 'Dalrd3'        | 0                | 5.15402                   | 1h                      |
| 'Dusp1'         | 22.7818          | 254.212                   | 1h                      |
| 'Dusp2'         | 2.37563          | 22.9875                   | 1h                      |
| 'Egr1'          | 18.126           | 680.799                   | 1h                      |
| 'Egr2'          | 1.58322          | 58.7534                   | 1h                      |
| 'Egr3'          | 1.8697           | 49.0469                   | 1h                      |
| 'Errfil'        | 26.4629          | 162.512                   | 1h                      |
| 'Fos'           | 0.475391         | 18.5828                   | 1h                      |
| 'Fosb'          | 0.415128         | 16.8939                   | 1h                      |
| 'Has2'          | 12.6329          | 76.5841                   | 1h                      |
| 'Hes1'          | 22.4634          | 253.506                   | 1h                      |
| 'Ier2'          | 32.603           | 196.579                   | 1h                      |
| 'Klf2'          | 4.1184           | 25.6258                   | 1h                      |
| 'Med19'         | 0                | 11.3654                   | 1h                      |
| 'Mxd3'          | 0                | 31.4573                   | 1h                      |
| 'Nr4a1'         | 1.87277          | 185.989                   | 1h                      |
| 'Nt5c3l'        | 0                | 34.9025                   | 1h                      |
| 'Pisd-ps3'      | 0                | 10.5308                   | 1h                      |
| 'Polr3h'        | 0                | 15.0563                   | 1h                      |
| 'Prickle3'      | 0                | 7.29054                   | 1h                      |
| 'Rad54l'        | 0                | 6.94284                   | 1h                      |
| 'Rfc4'          | 0                | 20.9275                   | 1h                      |
| 'Rgs16'         | 1.99682          | 30.3236                   | 1h                      |
| 'Rpl26'         | 0                | 111.215                   | 1h                      |
| 'Sgk1'          | 51.0718          | 290.122                   | 1h                      |
| 'Sync'          | 0                | 20.309                    | 1h                      |
| 'Txnrd2'        | 0                | 10.2652                   | 1h                      |
| 'Zfp36'         | 13.9853          | 102.737                   | 1h                      |
| 'Alkbh1'        | 0                | 7.25156                   | 6h                      |

|          |          |         |    |
|----------|----------|---------|----|
| 'Gpbar1' | 0        | 6.54794 | 6h |
| 'Has2'   | 12.6329  | 65.3957 | 6h |
| 'Heyl'   | 1.87305  | 23.8542 | 6h |
| 'Heyl'   | 0.315531 | 15.4937 | 6h |
| 'Hr'     | 1.40471  | 7.85818 | 6h |
| 'Il11'   | 0.10324  | 5.54274 | 6h |
| 'Il6'    | 0.487057 | 10.0101 | 6h |
| 'Inhba'  | 66.2761  | 493.125 | 6h |
| 'Med19'  | 0        | 10.9802 | 6h |
| 'Nrarp'  | 0.362193 | 15.0544 | 6h |
| 'Ntn4'   | 1.53885  | 8.07718 | 6h |
| 'Pkp1'   | 5.60393  | 39.8372 | 6h |
| 'Polr3h' | 0        | 17.3167 | 6h |
| 'Rfc4'   | 0        | 19.8498 | 6h |
| 'Rgs16'  | 1.99682  | 15.6184 | 6h |
| 'Rpl26'  | 0        | 165.91  | 6h |
| 'Sco2'   | 0        | 29.3184 | 6h |
| 'Ttc19'  | 0        | 10.2361 | 6h |
| 'Ubal2'  | 0        | 5.50867 | 6h |
